# Supplementary material for: Physiological Cell Culture Media Tune Mitochondrial Bioenergetics and Drug Sensitivity in Cancer Cell Models
Source: MDPI journal article supplement (doi:10.3390/cancers14163917), 2022-08-13
Supplement: s1 [file s1]

## Supplementary Information for

This PDF file includes:

Figures S1 to S3

Tables S1 to S2

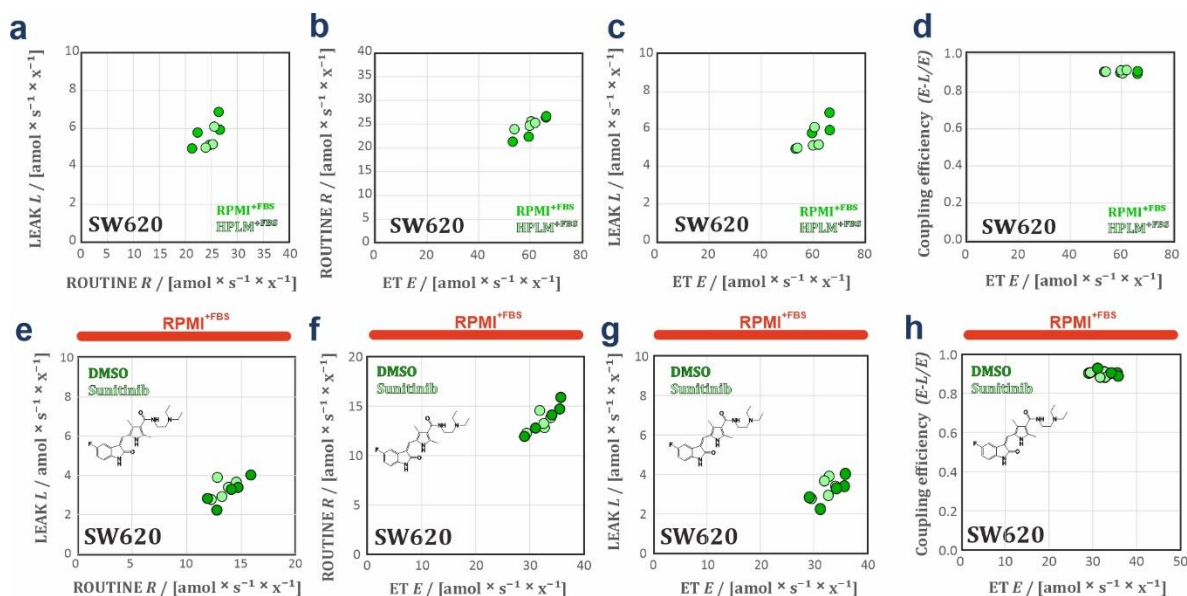

**Figure S1.** Bioenergetic cluster analysis in different respiratory coupling states of the SW620 cells in steady state and exposed to sunitinib grown in classical and HPLM media. BCA plots of steady state conditions (**a – d**) and sunitinib-exposed SW620 cells (**e – h**). Plots of  $L$  over  $R$ ,  $R$  over  $E$ , and  $L$  (**a – c**), and coupling efficiencies  $(E-L)/E$  (**d**) over ET capacities in SW620 cells showing no cluster differences between RPMI<sup>+FBs</sup> and HPLM<sup>+FBs</sup>. Plots of  $L$  over  $R$ ,  $R$  over  $E$ , and  $L$  (**e – g**) and coupling efficiencies  $(E-L)/E$  over  $E$  (**h**) in SW620 cells grown in RPMI<sup>+FBs</sup> and exposed to either DMSO or 10  $\mu$ M sunitinib for 3 h. No cluster differences between DMSO and sunitinib are observed. Sunitinib structure is represented for drug-exposed SW620 cells (**e – h**).

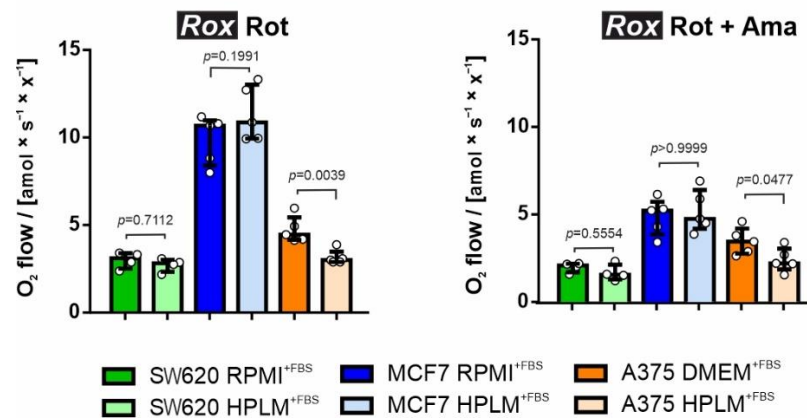

**Figure S2.** *Rox* in classical and HPLM<sup>+FBs</sup> media in SW620, MCF7, and A375 cell populations. Comparison of residual O<sub>2</sub> consumption (*Rox*) after rotenone (Rot, left panel) and rotenone + antimycin A additions (Rot + Ama, right panel) in SW620, MCF7 and A375 cell lines grown in RPMI<sup>+FBs</sup> / DMEM<sup>+FBs</sup> and HPLM<sup>+FBs</sup>. Values of O<sub>2</sub> flow [amol × s<sup>-1</sup> × x<sup>-1</sup>] are represented as median ± IQR (50% range). 2-wayANOVA with Bonferroni's multiple comparison test; *N* = 4.

**a**

| SW620 RPMI <sup>+FBs</sup> |                    | SW620 HPLM <sup>+FBs</sup> |                    |
|----------------------------|--------------------|----------------------------|--------------------|
| DMSO                       | Sunitinib 10 μM 3h | DMSO                       | Sunitinib 10 μM 3h |
| 99.50 % ± 0.21             | 99.63 % ± 0.16     | 99.31 % ± 0.11             | 99.36 % ± 0.22     |

**b**

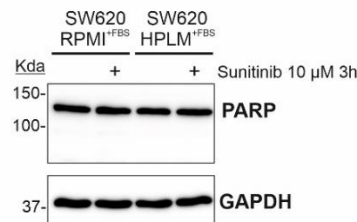

**Figure S3.** Sunitinib short-term treatment does not affect cell survival and apoptosis in SW620 cells. **(a)** Viability values of SW620 grown in in RPMI<sup>+FBs</sup> and HPLM<sup>+FBs</sup> and exposed to 10 μM sunitinib for 3 h. Viability was measured in living cells by the Casy® TT cell counter and analyser (Roche Innovatis AG, Germany). Values are median ± IQR (*N*=5) **(b)**. Western-Blot analysis of PARP-1 (46D11, Cell Signaling) of SW620 cells grown in RPMI<sup>+FBs</sup> and HPLM<sup>+FBs</sup>, and exposed to 10 μM sunitinib for 3 h. Sunitinib (+)/DMSO control. GAPDH (14C10, Cell Signaling) served as loading control (*N* = 4).

**Table S1.** Respiration of cancer cell lines SW620, MCF7, and A375 in classical media (RPMI or DMEM) and HPLM. Median  $\pm$  IQR (50% range). **(a)**  $R$ ,  $L$  and  $E$  corrected for residual oxygen consumption  $R_{ox}$ .  $N$  are biological replicates. **(b)** Flux control ratios, net capacities and flux control efficiencies normalized for ROUTINE or ET capacity as an internal normalization to express respiration independent of cell count.  $R_{ox}/E'_{tot}$  ratio is  $R_{ox}$  normalized against the total  $E'_{tot}$ .  $E'_{tot}$  is the ET capacity without  $R_{ox}$  correction. Bold case indicates statistical significance at  $p \leq 0.05$ .

| <b>a</b> | cell line -<br>culture media | number of<br>repeats $N$ or<br>groups | ROUTINE $R$<br>[ $\text{amol} \times \text{s}^{-1} \times \text{x}^{-1}$ ] | LEAK $L$<br>[ $\text{amol} \times \text{s}^{-1} \times \text{x}^{-1}$ ] | ET capacity $E$<br>[ $\text{amol} \times \text{s}^{-1} \times \text{x}^{-1}$ ] | $R_{ox}$<br>[ $\text{amol} \times \text{s}^{-1} \times \text{x}^{-1}$ ] |
|----------|------------------------------|---------------------------------------|----------------------------------------------------------------------------|-------------------------------------------------------------------------|--------------------------------------------------------------------------------|-------------------------------------------------------------------------|
|          | SW620-RPMI <sup>+FBS</sup>   | $N = 4$                               | $24.39 \pm 4.82$                                                           | $5.86 \pm 0.66$                                                         | $62.83 \pm 9.13$                                                               | $1.90 \pm 0.26$                                                         |
|          | SW620-HPLM <sup>+FBS</sup>   | $N = 4$                               | $24.95 \pm 0.88$                                                           | $5.14 \pm 0.31$                                                         | $60.13 \pm 2.48$                                                               | $1.55 \pm 0.32$                                                         |
|          | MCF7-RPMI <sup>+FBS</sup>    | $N = 5$                               | $79.31 \pm 4.78$                                                           | $30.79 \pm 3.95$                                                        | <b><math>180.90 \pm 14.03</math></b>                                           | $5.22 \pm 1.01$                                                         |
|          | MCF7-HPLM <sup>+FBS</sup>    | $N = 5$                               | $94.95 \pm 2.67$                                                           | $28.85 \pm 11.96$                                                       | <b><math>218.51 \pm 3.62</math></b>                                            | $4.74 \pm 1.38$                                                         |
|          | A375-RPMI <sup>+FBS</sup>    | $N = 5$                               | <b><math>20.16 \pm 0.79</math></b>                                         | $6.12 \pm 0.28$                                                         | <b><math>57.73 \pm 9.71</math></b>                                             | <b><math>3.44 \pm 0.90</math></b>                                       |
|          | A375-HPLM <sup>+FBS</sup>    | $N = 5$                               | <b><math>35.06 \pm 3.13</math></b>                                         | $8.83 \pm 1.85$                                                         | <b><math>92.22 \pm 6.05</math></b>                                             | <b><math>2.21 \pm 0.51</math></b>                                       |

  

| <b>b</b> | cell<br>line -<br>culture<br>media | number<br>of<br>repeats<br>$N$ or<br>groups | control<br>ratio<br>$R/E$         | control<br>ratio<br>$L/E$         | control<br>ratio<br>$L/R$         | net ET<br>capacity<br>$E-L$<br>[ $\text{amol} \times \text{s}^{-1} \times \text{x}^{-1}$ ] | net<br>$R/E$<br>ratio<br>$(R-L)/E$ | $E-L$<br>coupling<br>efficien-<br>cy<br>$(E-L)/E$ | $R-L$<br>control<br>efficien-<br>cy<br>$(R-L)/R$ | ROX<br>$R_{ox} / E'_{tot}$        |
|----------|------------------------------------|---------------------------------------------|-----------------------------------|-----------------------------------|-----------------------------------|--------------------------------------------------------------------------------------------|------------------------------------|---------------------------------------------------|--------------------------------------------------|-----------------------------------|
|          | SW620-<br>RPMI <sup>+FBS</sup>     | $N = 4$                                     | <b><math>0.40 \pm 0.01</math></b> | $0.10 \pm 0.01$                   | <b><math>0.25 \pm 0.03</math></b> | $56.51 \pm 7.23$                                                                           | <b><math>0.30 \pm 0.02</math></b>  | $0.90 \pm 0.01$                                   | <b><math>0.75 \pm 0.03</math></b>                | $0.03 \pm 0.00$                   |
|          | SW620-<br>HPLM <sup>+FBS</sup>     | $N = 4$                                     | <b><math>0.42 \pm 0.02</math></b> | $0.09 \pm 0.01$                   | <b><math>0.21 \pm 0.01</math></b> | $54.52 \pm 2.26$                                                                           | <b><math>0.33 \pm 0.01</math></b>  | $0.91 \pm 0.01$                                   | <b><math>0.79 \pm 0.01</math></b>                | $0.03 \pm 0.01$                   |
|          | MCF7-<br>RPMI <sup>+FBS</sup>      | $N = 5$                                     | $0.45 \pm 0.02$                   | <b><math>0.16 \pm 0.04</math></b> | $0.37 \pm 0.06$                   | <b><math>154.42 \pm 16.10</math></b>                                                       | $0.28 \pm 0.01$                    | $0.84 \pm 0.04$                                   | $0.63 \pm 0.06$                                  | $0.03 \pm 0.01$                   |
|          | MCF7-<br>HPLM <sup>+FBS</sup>      | $N = 5$                                     | $0.43 \pm 0.01$                   | <b><math>0.13 \pm 0.06</math></b> | $0.31 \pm 0.12$                   | <b><math>181.91 \pm 5.57</math></b>                                                        | $0.30 \pm 0.04$                    | $0.87 \pm 0.06$                                   | $0.69 \pm 0.12$                                  | $0.02 \pm 0.01$                   |
|          | A375-<br>RPMI <sup>+FBS</sup>      | $N = 5$                                     | $0.35 \pm 0.03$                   | $0.10 \pm 0.00$                   | $0.30 \pm 0.02$                   | <b><math>51.45 \pm 9.58</math></b>                                                         | $0.25 \pm 0.03$                    | $0.90 \pm 0.00$                                   | $0.70 \pm 0.02$                                  | <b><math>0.06 \pm 0.00</math></b> |
|          | A375-<br>HPLM <sup>+FBS</sup>      | $N = 5$                                     | $0.37 \pm 0.01$                   | $0.09 \pm 0.01$                   | $0.25 \pm 0.03$                   | <b><math>81.44 \pm 5.55</math></b>                                                         | $0.27 \pm 0.00$                    | $0.91 \pm 0.01$                                   | $0.75 \pm 0.03$                                  | <b><math>0.03 \pm 0.01</math></b> |

**Table S2.** Sunitinib effect on SW620 cell respiration in RPMI<sup>+FBS</sup> and HPLM<sup>+FBS</sup>. Median  $\pm$  IQR (50% range). **(a)** *R*, *L* and *E* corrected for residual oxygen consumption *Rox*. *N* are biological replicates. **(b)** Flux control ratios, net capacities and flux control efficiencies normalized for ROUTINE or ET capacity as an internal normalization to express respiration independent of cell count. Bold font indicates statistical significance at  $p \leq 0.05$  using a non-parametric unpaired t-test.

| <b>a</b> | cell line -<br>culture media   | condition | number<br>of repeats<br><i>N</i> or<br>groups | ROUTINE<br><i>R</i> [amol $\times$<br>s <sup>-1</sup> $\times$ X <sup>-1</sup> ] | LEAK <i>L</i><br>[amol $\times$ s <sup>-1</sup> $\times$ X <sup>-1</sup> ] | ET capacity<br><i>E</i> [amol $\times$<br>s <sup>-1</sup> $\times$ X <sup>-1</sup> ] | <i>Rox</i><br>[amol $\times$ s <sup>-1</sup> $\times$<br>X <sup>-1</sup> ] |
|----------|--------------------------------|-----------|-----------------------------------------------|----------------------------------------------------------------------------------|----------------------------------------------------------------------------|--------------------------------------------------------------------------------------|----------------------------------------------------------------------------|
|          | SW620-<br>RPMI <sup>+FBS</sup> | DMSO      | <i>N</i> = 6                                  | 13.11 $\pm$<br>3.74                                                              | 2.90 $\pm$ 1.47                                                            | 31.58 $\pm$ 7.92                                                                     | 0.76 $\pm$ 0.44                                                            |
|          |                                | Sunitinib | <i>N</i> = 6                                  | 13.23 $\pm$<br>1.42                                                              | 3.26 $\pm$ 0.84                                                            | 32.23 $\pm$ 1.79                                                                     | 0.66 $\pm$ 0.40                                                            |
|          | SW620-<br>HPLM <sup>+FBS</sup> | DMSO      | <i>N</i> = 5                                  | 9.86 $\pm$ 0.45                                                                  | 1.79 $\pm$ 0.88                                                            | <b>25.30 <math>\pm</math> 5.97</b>                                                   | 0.98 $\pm$ 0.15                                                            |
|          |                                | Sunitinib | <i>N</i> = 5                                  | 9.59 $\pm$ 1.23                                                                  | 2.27 $\pm$ 0.74                                                            | <b>19.24 <math>\pm</math> 5.22</b>                                                   | 0.98 $\pm$ 0.27                                                            |

  

| <b>b</b> | cell<br>line -<br>culture<br>media | condi-<br>tion | number<br>of<br>repeats<br><i>N</i> or<br>groups | con-<br>trol<br>ratio<br><i>R/E</i>       | con-<br>trol<br>ratio<br><i>L/E</i>   | con-<br>trol<br>ratio<br><i>L/R</i> | net ET<br>capaci-<br>ty <i>E-L</i><br>[amol $\times$<br>s <sup>-1</sup> $\times$ X <sup>-1</sup> ] | net<br><i>R/E</i><br>ratio<br>( <i>R-L</i> )/ <i>E</i> | <i>E-L</i><br>coupling<br>efficiency<br>( <i>E-L</i> )/ <i>E</i> | <i>R-L</i><br>control<br>efficien-<br>cy ( <i>R-<br/>L</i> )/ <i>R</i> |
|----------|------------------------------------|----------------|--------------------------------------------------|-------------------------------------------|---------------------------------------|-------------------------------------|----------------------------------------------------------------------------------------------------|--------------------------------------------------------|------------------------------------------------------------------|------------------------------------------------------------------------|
|          | SW620-<br>RPMI <sup>+FBS</sup>     | DMSO           | <i>N</i> = 6                                     | 0.41<br>$\pm$<br>0.02                     | 0.09 $\pm$<br>0.03                    | 0.22 $\pm$<br>0.07                  | 28.68<br>$\pm$ 6.69                                                                                | 0.32 $\pm$<br>0.02                                     | 0.91 $\pm$<br>0.03                                               | 0.78 $\pm$<br>0.07                                                     |
|          |                                    | Sunitini<br>b  | <i>N</i> = 6                                     | 0.41<br>$\pm$<br>0.04                     | 0.10 $\pm$<br>0.03                    | 0.25 $\pm$<br>0.04                  | 28.97<br>$\pm$ 2.11                                                                                | 0.31 $\pm$<br>0.03                                     | 0.90 $\pm$<br>0.03                                               | 0.75 $\pm$<br>0.04                                                     |
|          | SW620-<br>HPLM <sup>+FB</sup><br>s | DMSO           | <i>N</i> = 5                                     | <b>0.39<br/><math>\pm</math><br/>0.07</b> | <b>0.07 <math>\pm</math><br/>0.03</b> | 0.18 $\pm$<br>0.08                  | <b>23.51<br/><math>\pm</math> 5.34</b>                                                             | 0.32 $\pm$<br>0.09                                     | <b>0.93 <math>\pm</math><br/>0.03</b>                            | <b>0.82 <math>\pm</math><br/>0.08</b>                                  |
|          |                                    | Sunitini<br>b  | <i>N</i> = 5                                     | <b>0.50<br/><math>\pm</math><br/>0.07</b> | <b>0.12 <math>\pm</math><br/>0.04</b> | 0.24 $\pm$<br>0.06                  | <b>16.97<br/><math>\pm</math> 4.81</b>                                                             | 0.34 $\pm$<br>0.06                                     | <b>0.88 <math>\pm</math><br/>0.04</b>                            | <b>0.76 <math>\pm</math><br/>0.06</b>                                  |
